# Supplementary material for: GsMAS1 Encoding a MADS-box Transcription Factor Enhances the Tolerance to Aluminum Stress in Arabidopsis thaliana
Source: PubMed Central journal article supplement (PMC7139582; doi:10.3390/ijms21062004), 2020-03-15
Supplement: ijms-21-02004-s001.pdf [file ijms-21-02004-s001.pdf]

## Additional file 1

### Sequence information of CDS and amino acid

#### CDS sequence of *GsMAS1* (726 bp)

CCGGAATTCAGAGGCTCGAGTTTTTCAGCAGATTTCTCCTTCCAAATCACTCCTATAATTTTCAATTCAAAGG  
TGGTATTTGTGAAGGAACCCATAAAATATAATTTTTTGACCAAAGATGGGGAGAGGTAAGATTGCG  
ATTCGAAGGATCGACAACCTCCACTAGCCGGCAAGTGACTTTCTCAAAGAGAAGA  
AATGGATTGCTGAAGAAAGCTAGAGAATTATCAATTCTTTGTGATGCTGAAGTTG  
GATTGATGGTGTCTCCAGCACTGGGAAGCTTTATGACTATGCAAGCACAAGCAT  
GAAAGCGGTTATTGAACGCTACAACAAGCTAAAAGAGGAAACCCATCACCTCAT  
GAATCCGGCTTCAGAAGAGAAGTTTTTGGCAGACAGAAGCAGCAAGCTTGAGGCA  
GCAGCTTCAGTACTTGCAAGAATGCCACAGGCAATTAATGGGGGAAGAAGTTAC  
GGGTTTGGGTATTAAGAAGTACAAAATCTGGAAAACCAACTGGAGATGAGTTT  
AAAGGGTGTCCGCATGAAAAAGGATCAAATTTTAACTAATGAGATTAAGAAGT  
ACGCCAAAAGGGAAATATCATTCAAGAAAATGTTGAACTCTATCAAAGATG  
GAGCAGATCCAAAAGAAAATGCAGAGCTACAAAAGAAGGTTTATGAAGCAAG  
GAGTACAAATGAAGAAAATGTGGCATCCAATCCTTCTTACAACGTCAGAAATGGA  
TATGATTCACTTGCATCTATCAGTCTCCAGCTAAGTCAGCCACAGTCTCAATACAA  
ATACAGTGAACCATCAACCAAAGCAATGAAACTCGGATTGCAGCTGCATTAGCAA  
AACTGTTTCAGTAATCAGGGAGGTTGTCATTTGTGCAAGCCAGCCAACAAATCTTTCTAGAAGATCTCTAC  
AATATTCTCAGCTGCCATGGAAAATCGATGTTCTCTTTTATTCTCTCAAGATTTTCAGGCTGTATATTAAC  
TTATATTA

#### Amino acid sequence of *GsMAS1* protein (241 aa)

MGRGKIAIRRIDNSTSRQVTFSKRRNGLLKKARELSILCDAEVGLMVFSSTGKLYDYAS  
TSMKAVIERYNKLKEETHHLMNPASEEKFWQTEAASLRQQLQYLQECHRQLMGEEL  
TGLGIKELQNLLENQLEMSLKGVRMKKDQILTNEIKELRQKGNIIHQENVELYQKMEQI  
QKENAELQKKVYEARSTNEENVASNPYNVRNGYDSLASISLQLSQPQSQYKYSEPSTK  
AMKLGQLH\*

## Additional file 2

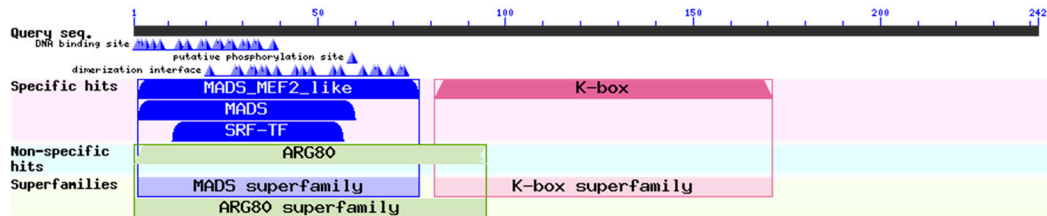

**Figure S1 The putative domains of the GsMAS1 protein**

The structure diagram comes from the NCBI website of the blast results using amino acid sequence of GsMAS1 protein. It belongs to MEF2 (myocyte enhancer factor 2)-like/Type II subfamily of MADS (MCM1, Agamous, Deficiens), and SRF (serum response factor) box family of eukaryotic transcriptional regulators. The MADS-box domain can bind DNA existing as hetero and homo-dimers.

### Additional file 3

**Table S1 List of the primers in present study**

| Serial number | Primer name       | Primer sequence (5'to3')                          | Purpose                                                                          |
|---------------|-------------------|---------------------------------------------------|----------------------------------------------------------------------------------|
| 1             | GsMAS1-F          | TTCTCCTTCCAAATCACTC                               | GsMAS1 cloning                                                                   |
| 2             | GsMAS1-R          | TTGTGGCTGGCTTGG                                   |                                                                                  |
| 3             | pZeroback/Blunt-F | CGACTCACTATAGGGAGAGCGGC                           | pZeroback-GsMAS1                                                                 |
| 4             | pZeroback/Blunt-R | AAGAACATCGATTTCCATGGCAG                           |                                                                                  |
| 5             | p-GsMAS1-F        | gagaacacgggggactctagaATGGGGAGAGGTAAGATTGCC        | pTF101.1-GsMAS1                                                                  |
| 6             | p-GsMAS1-R        | cgatcgggaaattcgagctcCTAATGCAGCTGCAATCCGAG         |                                                                                  |
| 7             | ACT3-F            | GCACCACCGGAGAGAAAATA                              | qRT-PCR                                                                          |
| 8             | ACT3-R            | GTGACAATGATGGACCAG                                |                                                                                  |
| 9             | qGsMAS1-F         | AGAGAAGTTTTGGCAGACAG                              |                                                                                  |
| 10            | qGsMAS1-R         | CCAGTTGGTTTTCCAGATTTTG                            |                                                                                  |
| 11            | At-TUB-F          | ATCGATTCCGTTCTCGATGT                              |                                                                                  |
| 12            | At-TUB-R          | ATCCAGTTCCTCCTCCAAC                               |                                                                                  |
| 13            | C-GsMAS1-F        | aattctgcagtcgacgggtaccAAATGGGGAGAGGTAAGATTGG<br>G | pYL322-d1-eGFP-GsMAS1                                                            |
| 14            | C-GsMAS1R         | ccttctcaccatcaggatccAATGCAGCTGCAATCCGAGTT         |                                                                                  |
| 15            | PGBKT7- GsMAS1-F  | aggacctgcatatggccatggAAATGGGGAGAGGTAAGATTG<br>CG  | pGBKT7- GsMAS1                                                                   |
| 16            | PGBKT7- GsMAS1-R  | ccgctgcaggtcgacggatccGCTAATGCAGCTGCAATCCGAG       |                                                                                  |
| 17            | bar-F             | CCTTCGCAAGACCCTTCCTC                              | Molecular identification for GsMAS1 transgenic lines by bar gene                 |
| 18            | bar-R             | CATGCGGACACCCTTTAAAC                              |                                                                                  |
| 19            | PGIP1-F           | CAACCTGGTCTATTGACTTATCAAG                         | Expression patterns of AI stress responsive genes regulated by GsMAS1 by qRT-PCR |
| 20            | PGIP1-R           | GAAGAACTGAAGAGGAGCTTCA                            |                                                                                  |
| 21            | PGIP2-F           | ATCCCGACTTTTACCGCATC                              |                                                                                  |
| 22            | PGIP2-R           | TGCCATTGTGATTCATGTCC                              |                                                                                  |
| 23            | WRKY46-F          | ACATCACATCCCCGAAGACG                              |                                                                                  |
| 24            | WRKY46-R          | ACTTCTTCGACTTGGTCGG                               |                                                                                  |
| 25            | ALS3-F            | TATCGATCCTTGCCGGGACTTCA                           |                                                                                  |
| 26            | ALS3-R            | GCTTGTCTGGCGTTGCTCCTA                             |                                                                                  |

|    |           |                           |  |
|----|-----------|---------------------------|--|
| 27 | AtMATE-F  | CCTTAGCGTTTGTGTTCCGATGGAG |  |
| 28 | AtMATE-R  | ACCATGAGTCGATGAGAGGAAGAG  |  |
| 29 | AtALMT1-F | GGCCGACCGTGCTATACGAG      |  |
| 30 | AtALMT1-R | CATGAGTCCTGTGAACTCCC      |  |
| 31 | STOP1-F   | TTCCGCGACTGATGTTTGAT      |  |
| 32 | STOP1-R   | ACAGGCATTCGCAATAAGCAT     |  |
| 33 | STOP2-F   | GTGGGTTTGCTCTTGTGGGAC     |  |
| 34 | STOP2-R   | TGCACGTGTCATTCTTGAG       |  |
